# Supplementary material for: Influence of Laminin Coating on the Autologous In Vivo Recellularization of Decellularized Vascular Protheses
Source: Materials (Basel). 2019 Oct 15;12(20):3351. doi: 10.3390/ma12203351 (PMC6829566; doi:10.3390/ma12203351)
Supplement: Supplementary file 1 [file materials-12-03351-s001.pdf]

Article

# Influence of Laminin Coating on the Autologous In Vivo Recellularization of Decellularized Vascular Protheses

Mahfuza Toshmatova, Sentaro Nakanishi, Yukiharu Sugimura, Vera Schmidt, Artur Lichtenberg, Alexander Assmann <sup>\*,†</sup> and Payam Akhyari

Department of Cardiovascular Surgery and Research Group for Experimental Surgery, Medical Faculty, Heinrich Heine University, Düsseldorf 40225, Germany; Mahfuza.Toshmatova@med.uni-duesseldorf.de (M.T.); snakanishi@asahikawa-med.ac.jp (S.N.); Yukiharu.Sugimura@med.uni-duesseldorf.de (Y.S.); Vera.Schmidt@med.uni-duesseldorf.de (V.S.); Artur.Lichtenberg@med.uni-duesseldorf.de (A.L.); payam.akhyari@med.uni-duesseldorf.de (P.A.)

<sup>†</sup> Further affiliation beyond this work: Biomaterials Innovation Research center, Brigham and Women's Hospital, Department of Medicine, Harvard Medical School, Boston, MA 02139, USA

\* Correspondence: alexander.assmann@med.uni-duesseldorf.de; Tel.: +49-211-81-18331

Received: 18 August 2019; Accepted: 10 October 2019; Published: date

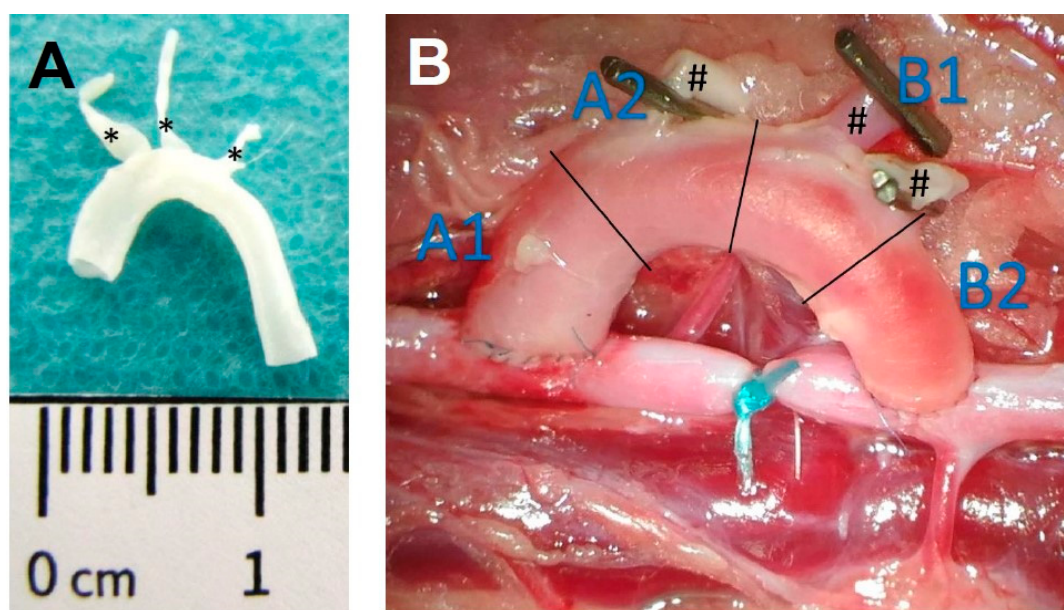

**Supplemental Figure S1:** Decellularized aortic graft after laminin coating (A, asterisks indicate supraaortic branches). Decellularized graft after implantation to the infrarenal aorta (B, hashes indicate supraaortic branches, A1–B2 indicate the four graft regions defined for read-out after explantation).

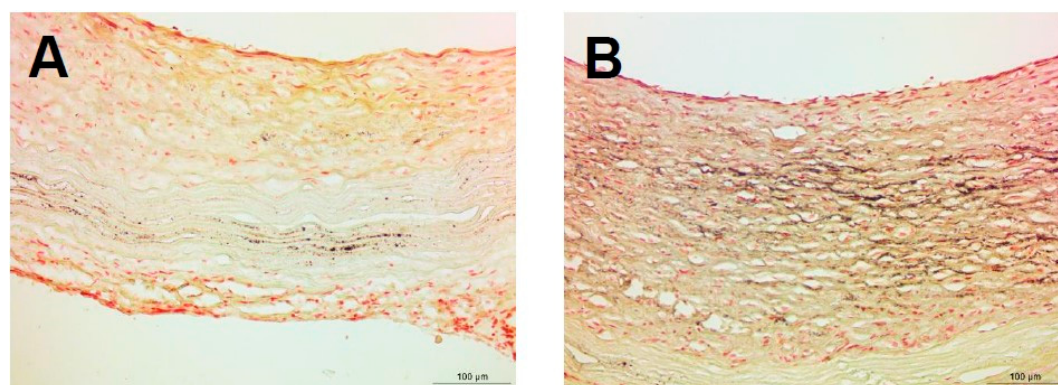

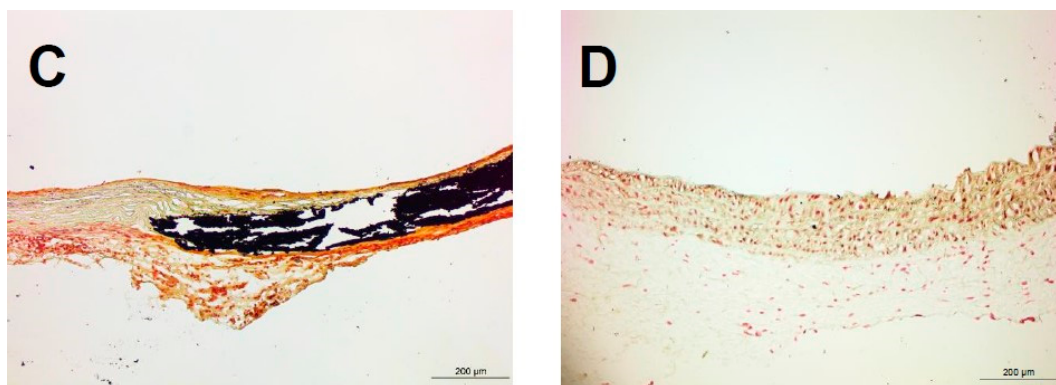

**Supplemental Figure S2:** Representative cross-sections through the ascending aorta of grafts after 8 weeks *in vivo*. In both groups, minor local (A) or extended (B) microcalcifications and macrocalcifications (C) were observed. Medially repopulated areas did not show any calcifications (D). Von Kossa staining. Scale bars = 100 µm in A,B / 200 µm in C,D.
